# Supplementary material
Source: Springer Nature journal article supplement (https://www.springermedizin.de/resource/supplementary/12885_2013_4579_MOESM6_ESM.pdf/9466680)

**A**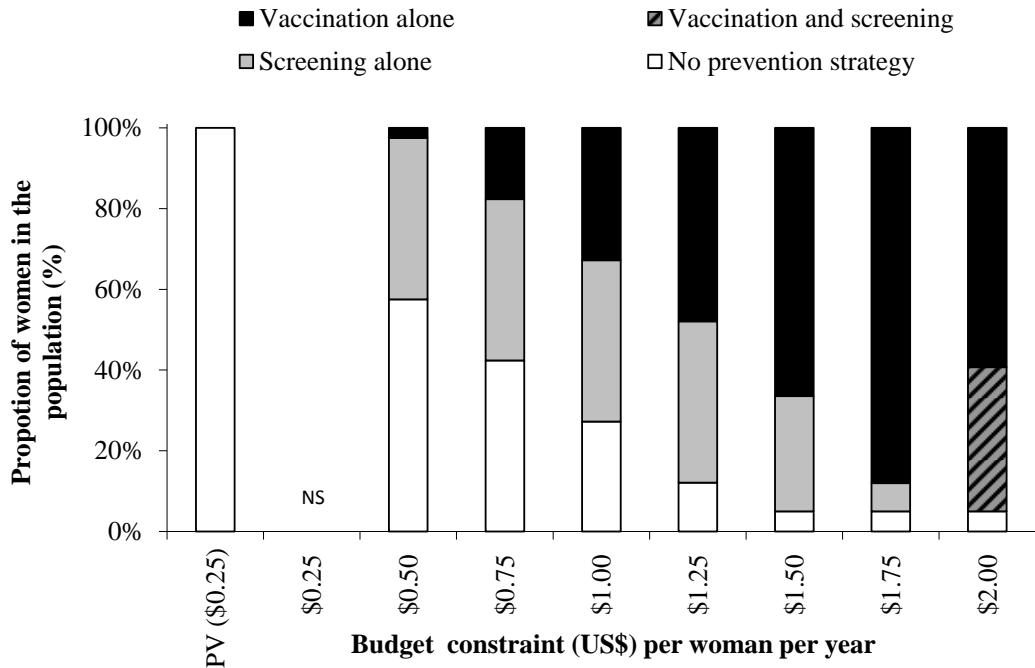**B**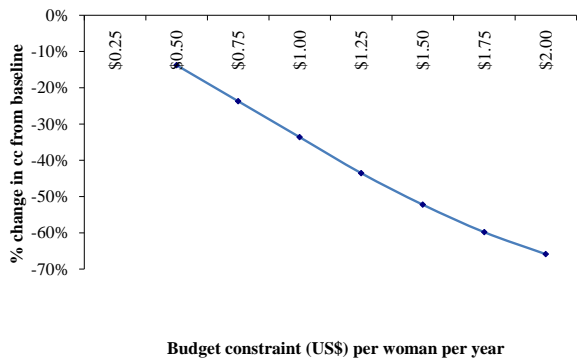**C**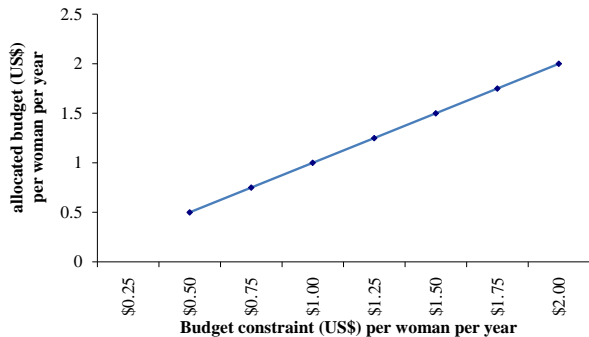

Supplement: MOESM6 [file 9466680]
